# Supplementary material for: Combinatorial effects of cannabinoid receptor 1 and 2 agonists on characteristics and proteomic alteration in MDA-MB-231 breast cancer cells
Source: PubMed Central journal article supplement (PMC11554208; doi:10.1371/journal.pone.0312851), 2024-11-11
Supplement: pone.0312851.s001.pdf [file pone.0312851.s001.pdf]

**S1 Table.** The table shows the list of genes and their primers for gene expression study by qRT-PCR.

| <b>Gene</b>                                               | <b>Accession number</b> | <b>Primer sequences</b>                                                                      |
|-----------------------------------------------------------|-------------------------|----------------------------------------------------------------------------------------------|
| <b>ZPR1</b><br>(ZPR1 zinc finger)                         | NM_003904.5             | <b>Forward</b><br>5'-CACCAAGATTCCCTTCTTCA-3'<br><b>Reverse</b><br>5'-CTGACAGACAAAGTGTAGCG-3' |
| <b>SHC1</b><br>(SHC adaptor protein 1)                    | XM_054338223.1          | <b>Forward</b><br>5'-CAGGCAGAGAGCTTTTTGAT-3'<br><b>Reverse</b><br>5'-CCATTGATAGCAGGATTGGG-3' |
| <b>MAPK15</b><br>(mitogen-activated protein kinase 15)    | NM_139021.3             | <b>Forward</b><br>5'-GCATTGTCCGGAGATACCTA-3'<br><b>Reverse</b><br>5'-GGGCATCTGTCTTATCCCTA-3' |
| <b>TP53</b><br>(Tumor protein p53)                        | NM_000546.6             | <b>Forward</b><br>5'-GGACACTTTGCGTTCGG-3'<br><b>Reverse</b><br>5'-GCTAGGATCTGACTGCGG-3'      |
| <b>ANAPC1</b><br>(Anaphase promoting complex subunit 1)   | NM_022662.4             | <b>Forward</b><br>5'-CAGAAGCTGTCTGTCTCTTG-3'<br><b>Reverse</b><br>5'-GGAACATCTGATGAGAGCAC-3' |
| <b>AXL</b><br>(AXL receptor tyrosine kinase)              | NM_001278599.2          | <b>Forward</b><br>5'-CTCTCAGGATCCAAGCTAAG-3'<br><b>Reverse</b><br>5'-TGGGATAGGTAGGAAGACAG-3' |
| <b>VAV2</b><br>(VAV guanine nucleotide exchange factor 2) | NM_001134398.2          | <b>Forward</b><br>5'-TACAGCTACGAGCTCAAGGA-3'<br><b>Reverse</b><br>5'-CACATTTCCCGTGAGACTTC-3' |
| <b>RAC1</b><br>(Rac family small GTPase 1)                | NM_006908.5             | <b>Forward</b><br>5'-GGTAGATGGAAAACCGGTGA-3'<br><b>Reverse</b><br>5'-GAACACATCTGTTTGCGGAT-3' |
| <b>ALDOC</b><br>(Aldolase C)                              | NM_005165.3             | <b>Forward</b><br>5'-CATAGGATGGGAGGATAGGG-3'<br><b>Reverse</b><br>5'-TCATGGGAAAATTGTGGGAG-3' |
| <b>ACTB</b><br>( $\beta$ -actin; housekeeping)            | NM_001101.5             | <b>Forward</b><br>5'-AAACTGGAACGGTGAAGG-3'<br><b>Reverse</b><br>5'-ACAACGCATCTCATATTTGGAA-3' |
