# Supplementary material for: Combinatorial effects of cannabinoid receptor 1 and 2 agonists on characteristics and proteomic alteration in MDA-MB-231 breast cancer cells
Source: PubMed Central journal article supplement (PMC11554208; doi:10.1371/journal.pone.0312851), 2024-11-11
Supplement: pone.0312851.s002.pdf [file pone.0312851.s002.pdf]

**S2 Table.** Unique protein alteration of MDA-MB-231 exposed to the combination treatment of ratio 2:1 (ACEA:GW405833) for 48 hours, were identified.

| Accession       | Log <sub>2</sub> intensities |        |        |                 |        |        | -Log<br>(p-value) | Direction |
|-----------------|------------------------------|--------|--------|-----------------|--------|--------|-------------------|-----------|
|                 | Vehicle control              |        |        | Combination 2:1 |        |        |                   |           |
|                 | Rep.1                        | Rep.2  | Rep.3  | Rep.1           | Rep.2  | Rep.3  |                   |           |
| <b>OGN</b>      | 19.257                       | 18.855 | 18.407 | 17.955          | 18.014 | 17.815 | 2.033             | Down      |
| <b>P4HA1</b>    | 20.999                       | 21.495 | 21.782 | 22.351          | 22.238 | 22.299 | 2.102             | Up        |
| <b>EIF3H</b>    | 19.948                       | 20.364 | 20.142 | 18.948          | 19.427 | 19.540 | 2.150             | Down      |
| <b>RRM2</b>     | 18.095                       | 17.715 | 18.292 | 18.684          | 18.703 | 18.772 | 2.162             | Up        |
| <b>ZPR1</b>     | 20.363                       | 20.386 | 20.435 | 19.499          | 19.836 | 19.975 | 2.279             | Down      |
| <b>ANAPC1</b>   | 15.418                       | 15.368 | 15.827 | 16.160          | 16.308 | 16.192 | 2.337             | Up        |
| <b>LRP10</b>    | 16.694                       | 16.718 | 16.411 | 17.231          | 17.057 | 17.348 | 2.359             | Up        |
| <b>MRPL1</b>    | 19.692                       | 19.525 | 19.670 | 18.878          | 19.215 | 18.835 | 2.476             | Down      |
| <b>HEBP1</b>    | 19.972                       | 19.885 | 20.185 | 20.721          | 20.571 | 20.513 | 2.561             | Up        |
| <b>PHYHD1</b>   | 19.547                       | 19.477 | 19.431 | 19.003          | 18.978 | 18.695 | 2.632             | Down      |
| <b>SCARB2</b>   | 19.623                       | 19.262 | 19.311 | 20.017          | 20.046 | 20.114 | 2.662             | Up        |
| <b>CD81</b>     | 20.372                       | 20.558 | 20.595 | 21.189          | 21.045 | 21.365 | 2.753             | Up        |
| <b>BROX</b>     | 20.050                       | 20.030 | 19.976 | 19.586          | 19.408 | 19.296 | 2.835             | Down      |
| <b>SMG9</b>     | 17.606                       | 17.668 | 17.412 | 16.888          | 16.965 | 16.716 | 2.885             | Down      |
| <b>LNPEP</b>    | 20.079                       | 19.918 | 19.821 | 20.544          | 20.465 | 20.567 | 2.898             | Up        |
| <b>ABCD3</b>    | 19.837                       | 19.857 | 20.077 | 20.505          | 20.625 | 20.497 | 2.909             | Up        |
| <b>ZNF207</b>   | 19.669                       | 19.616 | 19.702 | 19.126          | 18.898 | 18.773 | 2.942             | Down      |
| <b>PRPF3</b>    | 17.556                       | 17.810 | 17.806 | 16.820          | 17.085 | 16.933 | 2.962             | Down      |
| <b>EHD2</b>     | 21.597                       | 21.373 | 21.396 | 22.114          | 22.021 | 22.129 | 3.071             | Up        |
| <b>MT-CYB</b>   | 18.332                       | 18.348 | 18.374 | 17.883          | 17.748 | 17.665 | 3.134             | Down      |
| <b>DICER1</b>   | 17.860                       | 17.557 | 17.815 | 16.799          | 16.973 | 16.903 | 3.188             | Down      |
| <b>ATP1B3</b>   | 20.405                       | 20.522 | 20.426 | 21.221          | 21.108 | 21.005 | 3.219             | Up        |
| <b>AK2</b>      | 21.823                       | 21.783 | 21.652 | 21.160          | 21.097 | 21.182 | 3.284             | Down      |
| <b>SEC61A1</b>  | 21.671                       | 21.753 | 21.762 | 20.958          | 20.996 | 21.164 | 3.310             | Down      |
| <b>NUP107</b>   | 19.129                       | 19.121 | 19.010 | 19.856          | 19.701 | 19.749 | 3.425             | Up        |
| <b>SLC25A22</b> | 19.257                       | 18.855 | 18.407 | 17.955          | 18.014 | 17.815 | 2.033             | Down      |
