# Supplementary material for: Combinatorial effects of cannabinoid receptor 1 and 2 agonists on characteristics and proteomic alteration in MDA-MB-231 breast cancer cells
Source: PubMed Central journal article supplement (PMC11554208; doi:10.1371/journal.pone.0312851), 2024-11-11
Supplement: pone.0312851.s004.pdf [file pone.0312851.s004.pdf]

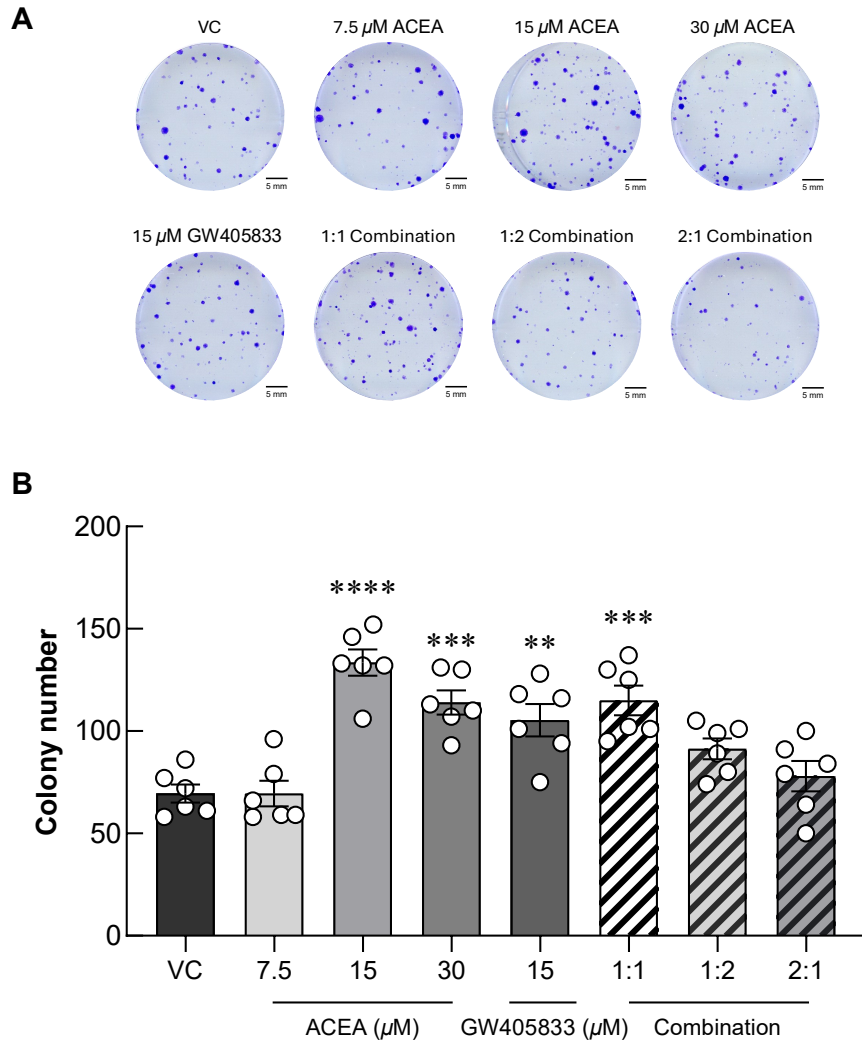

**S2 Fig. A specific 2:1 combination of ACEA and GW405833 did not show a long-term inhibition on MCF-7 colony formation.** (A) Representative images of colony formation of MCF-7 pre-exposed to ACEA, GW405833 and their combination; (B) Colony number of MCF-7 pre-exposed to CB agonists was represented by mean  $\pm$  SEM from three independent biological replicates with internal technical duplicates each. (\*\* $p < 0.01$ , \*\*\* $p < 0.001$ , and \*\*\*\* $p < 0.0001$  versus control)
