# Supplementary material for: Combinatorial effects of cannabinoid receptor 1 and 2 agonists on characteristics and proteomic alteration in MDA-MB-231 breast cancer cells
Source: PubMed Central journal article supplement (PMC11554208; doi:10.1371/journal.pone.0312851), 2024-11-11
Supplement: pone.0312851.s005.pdf [file pone.0312851.s005.pdf]

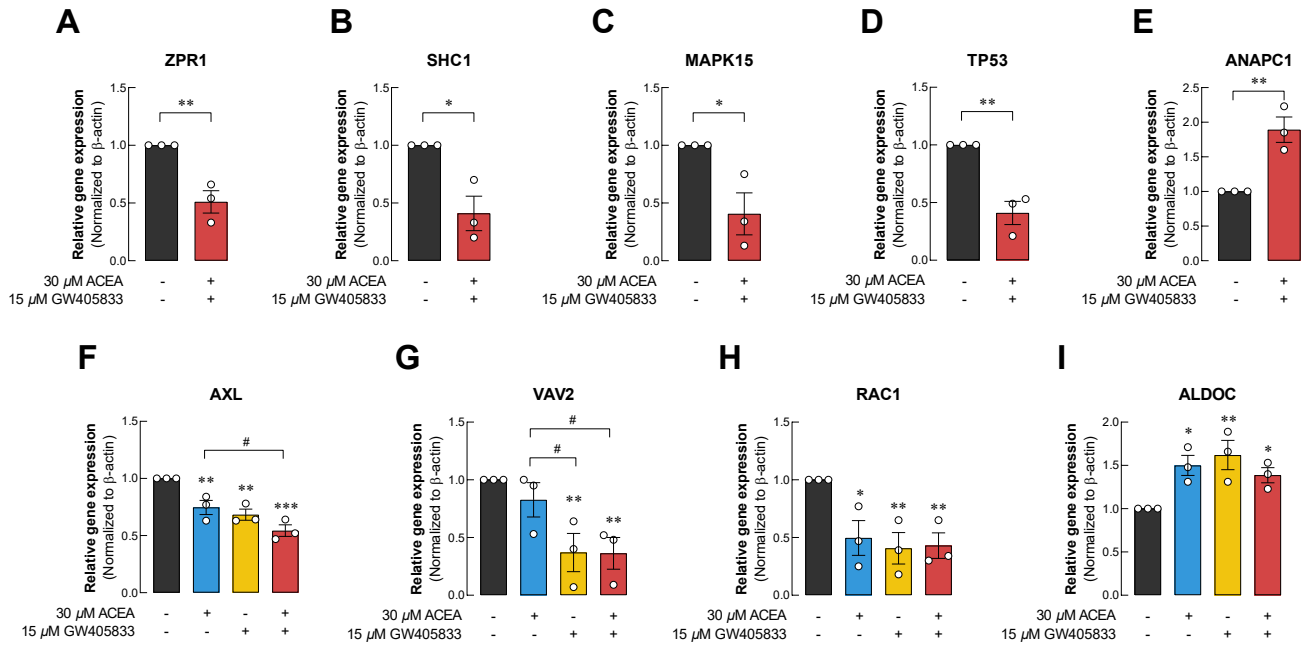

**S3 Fig. Gene expression alterations of MDA-MB-231 cells exposed to CB agonists were investigated by qRT-PCR.** (A) ZPR1, (B) SHC1, (C) MAPK15, (D) TP53, (E) ANAPC, (F) AXL, (G) VAV2, (H) RAC1 and (I) ALDOC. Bar graphs represented mean  $\pm$  SEM from three independent biological replicates. ( $*p < 0.05$ ,  $**p < 0.01$  versus control, while  $\#p < 0.05$  and  $##p < 0.01$ )
